# Supplementary material for: Maternal Gestational Diabetes Mellitus and Newborn DNA Methylation: Findings From the Pregnancy and Childhood Epigenetics Consortium
Source: Oxford University Press journal article supplement (doi:10.2337/dc19-0524), 2019-10-10
Supplement: dc190524supplementarydata2.xlsx [file dc190524supplementarydata2.xlsx]

## Sheet: Table S2
Table S2. Top Hits from PREDO Before vs. After Adjustment for Parity
CpG	Original Effect Estimate	Original SE	Original P-Value	Effect Estimate After Parity Adjustment	SE After Parity Adjustment	P-Value After Parity Adjustment	% Difference in Effect Estimate After Parity Adjustment
cg00552600	0.0135498	0.00284355	1.89e-06	0.0135815	0.00284354	1.79e-06	-0.233985
cg01517364	0.00920111	0.00212609	1.51e-05	0.00915004	0.00213084	1.75e-05	0.554976
cg02997962	-0.0246346	0.00584687	2.52e-05	-0.0248078	0.00587891	2.45e-05	-0.703015
cg03888553	-0.0175122	0.00412173	2.15e-05	-0.0174847	0.00410983	2.1e-05	0.156863
cg04113056	-0.00407476	0.000943871	1.58e-05	-0.00407954	0.00093425	1.26e-05	-0.117288
cg04521724	0.0096715	0.00224757	1.68e-05	0.00955932	0.0022818	2.8e-05	1.15988
cg04727230	-0.0156384	0.00360489	1.44e-05	-0.0155855	0.00358064	1.34e-05	0.337697
cg07992840	0.0161215	0.00371562	1.43e-05	0.0161074	0.00371938	1.49e-05	0.0874892
cg09165554	-0.025773	0.00598108	1.64e-05	-0.0253469	0.00591243	1.81e-05	1.65361
cg13975093	0.00601841	0.0013884	1.46e-05	0.00619672	0.00138663	7.86e-06	-2.96287
cg14144732	0.00369105	0.000876665	2.55e-05	0.00374753	0.000873045	1.77e-05	-1.53014
cg14691529	-0.00234498	0.000530299	9.78e-06	-0.00233521	0.000529644	1.04e-05	0.416771
cg15876968	-0.0175883	0.00398371	1.01e-05	-0.0176903	0.00401165	1.03e-05	-0.579983
cg17899761	-0.0150276	0.00320076	2.67e-06	-0.0147684	0.00321245	4.28e-06	1.725
cg18024053	-0.0134028	0.00286283	2.85e-06	-0.0134441	0.00287696	2.97e-06	-0.308389
cg21672843	0.00154874	0.000364816	2.18e-05	0.00154674	0.000364885	2.25e-05	0.129353
cg21904489	-0.021192	0.00454783	3.17e-06	-0.0212307	0.00453902	2.91e-06	-0.182738
cg22971191	-0.0284018	0.00620064	4.64e-06	-0.0283451	0.00628358	6.45e-06	0.199374
cg23115387	-0.0168641	0.00342979	8.79e-07	-0.0170392	0.00341608	6.1e-07	-1.0384
cg24729988	0.012271	0.00254361	1.41e-06	0.012323	0.00253761	1.2e-06	-0.423459
The 20 most significant CpGs for PREDO are presented before versus after adjustment for parity. The base model was adjusted for newborn's sex, maternal age, maternal education level, maternal body mass index, maternal smoking status during pregnancy, maternal genetic ancestry or race/ethnicity, and estimated cord blood cell fractions

## Sheet: Table S3
Table S2. Top Hits from Project Viva Before vs. After Adjustment for Parity
CpG	Original Effect Estimate	Original SE	Original P-Value	Effect Estimate After Parity Adjustment	SE After Parity Adjustment	P-Value After Parity Adjustment	% Difference in Effect Estimate After Parity Adjustment
cg27251412	-0.0388738	0.00574791	1.35e-11	-0.0390373	0.00573925	1.03e-11	0.420652
cg14531840	-0.0174493	0.0026132	2.43e-11	-0.0176505	0.0026493	2.7e-11	1.1531
cg18689454	-0.0597245	0.00937039	1.84e-10	-0.0592241	0.00946597	3.94e-10	-0.837976
cg11923631	-0.0391334	0.0062926	5e-10	-0.0391537	0.00632475	6e-10	0.0518394
cg16717549	-0.0532984	0.0085512	4.58e-10	-0.0530041	0.00855604	5.83e-10	-0.552237
cg07569069	0.0025933	0.0004359	2.69e-09	0.00255194	0.000444353	9.3e-09	-1.59473
cg01686093	-0.0183064	0.00310022	3.53e-09	-0.0184092	0.0031191	3.59e-09	0.561619
cg14353184	0.0239906	0.00411969	5.77e-09	0.0237735	0.00413246	8.77e-09	-0.904963
cg00110695	-0.0194742	0.00337376	7.82e-09	-0.0192707	0.00341567	1.68e-08	-1.04524
cg23732845	-0.0369259	0.00658612	2.06e-08	-0.036161	0.00674573	8.3e-08	-2.07165
cg22813165	-0.0300778	0.00534131	1.79e-08	-0.0297513	0.00520357	1.08e-08	-1.08552
cg18335247	0.00610601	0.00109455	2.43e-08	0.00610734	0.00109082	2.16e-08	0.0217286
cg04943440	-0.024271	0.00435096	2.43e-08	-0.0241892	0.00437264	3.17e-08	-0.336915
cg23092086	-0.0197671	0.0035217	1.99e-08	-0.0197805	0.00353189	2.14e-08	0.0678123
cg05749493	-0.0459568	0.00824876	2.53e-08	-0.0458727	0.00825924	2.79e-08	-0.182902
cg04737137	-0.0210951	0.00379947	2.82e-08	-0.0211918	0.00377377	1.96e-08	0.458187
cg19436270	-0.0347154	0.00633166	4.19e-08	-0.0352446	0.0069819	4.46e-07	1.52429
cg16440561	-0.013509	0.002488	5.65e-08	-0.0135014	0.00250751	7.27e-08	-0.0564881
cg03988700	-0.0685561	0.0126459	5.92e-08	-0.0694132	0.0131272	1.24e-07	1.25036
cg09510531	-0.0272652	0.00503832	6.25e-08	-0.0273327	0.00504425	6.01e-08	0.247606
The 20 most significant CpGs for Project Viva are presented before versus after adjustment for parity. The base model was adjusted for newborn's sex, maternal age, maternal education level, maternal body mass index, maternal smoking status during pregnancy, maternal genetic ancestry or race/ethnicity, and estimated cord blood cell fractions

## Sheet: Table S6
Table S6. Look-Up Results for Meta-Analysis Unadjusted for Cell Heterogeneity
MarkerName	Study	Effect.Estimate	Gene	Notes	Meta.Analysis.Effect.Estimate	StdErr	P_value	P_FDR	Direction	HetISq	HetChiSq	HetDf	HetPVal	chr	pos	strand	Relation_to_Island	UCSC_RefGene_Name	UCSC_RefGene_Group
cg01784351	El Hajj	-	MEST		-0.0007	0.0027	0.7808	0.947794	++-++-	0	1.527	5	0.9099	chr7	130132265	-	Island	MEST;MEST;MESTIT1;MEST	5'UTR;5'UTR;TSS1500;Body
cg04111177	El Hajj	-	NR3C1		0.0004	0.0006	0.5766	0.933044	+-+--+	2.1	5.108	5	0.4029	chr5	142783607	-	Island	NR3C1;NR3C1;NR3C1;NR3C1;NR3C1;NR3C1;NR3C1	5'UTR;TSS1500;5'UTR;5'UTR;5'UTR;TSS1500;TSS1500
cg05556276	El Hajj	-	MEST		0.0003	0.0015	0.8117	0.947794	+-++-+	0	2.705	5	0.7453	chr7	130132161	-	Island	MEST;MEST;MEST;MESTIT1	5'UTR;1stExon;5'UTR;TSS1500
cg05862114	El Hajj	-	MEST		0.0005	0.0022	0.8326	0.947794	+--+++	0	4.937	5	0.4236	chr7	130132259	-	Island	MEST;MEST;MESTIT1;MEST	5'UTR;5'UTR;TSS1500;Body
cg15910486	El Hajj	-	NR3C1		0.0005	0.0005	0.2671	0.860695	+--+++	59	12.191	5	0.03226	chr5	142783621	+	Island	NR3C1;NR3C1;NR3C1;NR3C1;NR3C1;NR3C1;NR3C1	5'UTR;TSS1500;5'UTR;5'UTR;5'UTR;TSS1500;TSS1500
cg17580798	El Hajj	-	MEST		0.0005	0.0022	0.8078	0.947794	++-+++	0	4.055	5	0.5415	chr7	130132199	-	Island	MEST;MEST;MESTIT1;MEST	5'UTR;5'UTR;TSS1500;Body
cg17860381	El Hajj	-	NR3C1		0.0003	0.0001	0.0294	0.52332	+-++++	13.6	5.786	5	0.3276	chr5	142783569	-	Island	NR3C1;NR3C1;NR3C1;NR3C1;NR3C1;NR3C1;NR3C1	5'UTR;TSS1500;5'UTR;5'UTR;5'UTR;TSS1500;TSS1500
cg18068240	El Hajj	-	NR3C1		0	0.0001	0.9735	0.984563	+-+--+	20	6.249	5	0.2827	chr5	142783843	-	Island	NR3C1;NR3C1;NR3C1;NR3C1;NR3C1;NR3C1;NR3C1	5'UTR;TSS1500;5'UTR;5'UTR;5'UTR;TSS1500;TSS1500
cg00063535	Haertle	0.0175	TPCN1		-0.0003	0.0017	0.8815	0.953801	----++	19	6.169	5	0.2901	chr12	113729491	-	OpenSea	TPCN1;TPCN1	Body;Body
cg00273340	Haertle	0.0145	CCDC88B		-0.0003	0.0009	0.7284	0.947794	-+++--	0	4.507	5	0.4789	chr11	64112444	-	Island	CCDC88B	Body
cg00730857	Haertle	0.009	WHSC2		-0.0009	0.001	0.3965	0.860695	---++-	7	5.374	5	0.372	chr4	1994281	-	N_Shore	WHSC2	Body
cg01203331*	Haertle	0.0149	NOP56; SNORD56, 57, 86		0.0028	0.0013	0.02623	0.52332	+++++-	55.1	11.14	5	0.04868	chr20	2636597	-	S_Shelf	SNORD57;NOP56;NOP56;SNORD56;SNORD86	TSS1500;Body;Body;TSS1500;TSS200
cg01205011	Haertle	-0.0244	ZNF76		0.0013	0.0026	0.6097	0.947794	-+++-+	0	3.104	5	0.684	chr6	35262113	-	OpenSea	ZNF76	Body
cg01955962	Haertle	-0.0064	CpG island		0	0.0006	0.9906	0.9906	+---++	55.1	11.139	5	0.04869	chr15	73089536	+	Island
cg01968402	Haertle	0.0058	North shore		0.0004	0.0003	0.1787	0.722923	+--+++	0	4.853	5	0.4341	chr6	137817775	+	N_Shore
cg01993865	Haertle	-0.0078	DSTN		-0.0001	0.0002	0.5743	0.933044	+-++-+	27.3	6.878	5	0.2299	chr20	17550690	-	Island	DSTN;DSTN;DSTN;DSTN	5'UTR;5'UTR;1stExon;1stExon
cg02683621	Haertle	0.0159	North shore		-0.0012	0.0013	0.3629	0.860695	++---+	0	4.116	5	0.5328	chr7	150100820	+	N_Shore
cg02943336	Haertle	0.0133	CARD11		-0.0014	0.001	0.1753	0.722923	-+----	0	4.592	5	0.4677	chr7	2959067	+	OpenSea	CARD11	Body
cg03246914	Haertle	-0.0305	TUBB1		-0.0064	0.0033	0.05151	0.573049	++----	11.1	5.626	5	0.3443	chr20	57596113	+	N_Shelf	TUBB1	Body
cg03345925*	Haertle	0.0383	ZC3H3		0.0069	0.0035	0.04774	0.573049	++-++-	36.5	7.873	5	0.1634	chr8	144599347	+	N_Shelf	ZC3H3	Body
cg04078644	Haertle	-0.0169	North shelf		-0.0014	0.0011	0.2326	0.828056	-++---	0	4.487	5	0.4817	chr3	155458975	+	N_Shelf
cg04514868	Haertle	0.0108	MTA1		0.0003	0.0012	0.7875	0.947794	+++++-	0	1.763	5	0.8809	chr14	105931040	+	Island	MTA1	Body
cg05536286	Haertle	-0.0122	ST8SIA2		-0.0007	0.0011	0.5463	0.933044	--++--	0	3.448	5	0.6312	chr15	92972514	-	OpenSea	ST8SIA2	Body
cg05697697	Haertle	0.0062	XPNPEP1		0.0001	0.0002	0.7335	0.947794	++--+-	33.4	7.503	5	0.1858	chr10	111683345	+	Island	XPNPEP1;XPNPEP1;XPNPEP1	TSS200;TSS200;TSS200
cg07018980	Haertle	0.0167	GAK		-0.001	0.0011	0.3884	0.860695	+---+-	0	3.884	5	0.5662	chr4	895604	+	S_Shore	GAK	Body
cg07431064	Haertle	0.0112	CBX7		-0.0002	0.0015	0.8895	0.953801	+-+++-	0	4.352	5	0.4999	chr22	39529217	+	OpenSea	CBX7	3'UTR
cg07689396	Haertle	0.0142	PRKAR1B		-0.0031	0.0016	0.04817	0.573049	+----+	73.5	18.889	5	0.002016	chr7	633050	+	S_Shore	PRKAR1B;PRKAR1B;PRKAR1B;PRKAR1B;PRKAR1B;PRKAR1B	Body;Body;Body;Body;Body;Body
cg08077807	Haertle	-0.0253	PRKCH		-0.0003	0.0013	0.8147	0.947794	-+-+--	0	4.861	5	0.4331	chr14	62001072	+	OpenSea	PRKCH	Body
cg08144943	Haertle	0.0191	PPM1M		0.0018	0.0019	0.3434	0.860695	+-+-+-	17.3	6.044	5	0.3019	chr3	52280702	+	S_Shore	PPM1M;PPM1M	5'UTR;5'UTR
cg08440349	Haertle	0.0133	ATP2C2		-0.0016	0.0015	0.3047	0.860695	--+---	0	4.804	5	0.4403	chr16	84486704	+	OpenSea	ATP2C2	Body
cg08542429	Haertle	0.0142	AGPAT1		-0.0006	0.0015	0.6967	0.947794	++-+?-	4.5	4.188	4	0.3811	chr6	32139120	+	S_Shelf	AGPAT1;AGPAT1	Body;Body
cg08732684	Haertle	0.022	ATF6B		-0.0003	0.0018	0.8667	0.9523	++-+?-	56.8	9.26	4	0.05492	chr6	32095128	+	N_Shelf	ATF6B;ATF6B	Body;Body
cg09244071	Haertle	0.0138	CUX1		-0.0003	0.0012	0.7838	0.947794	-+-+--	0	2.724	5	0.7424	chr7	101768746	-	OpenSea	CUX1;CUX1;CUX1	Body;Body;Body
cg10288510	Haertle	-0.0089	CpG island		0.0001	0.0011	0.9612	0.984563	++-+-+	0	2.249	5	0.8138	chr1	214158727	-	Island
cg10778517	Haertle	0.0118	MAD1L1		0.0007	0.0008	0.3828	0.860695	-++--+	44.7	9.044	5	0.1073	chr7	2252773	+	S_Shelf	MAD1L1;MAD1L1;MAD1L1	Body;Body;Body
cg11010397	Haertle	-0.0181	AMPH		0.0004	0.001	0.6499	0.947794	-----+	49.8	9.956	5	0.07648	chr7	38671977	+	S_Shore	AMPH;AMPH	TSS1500;TSS1500
cg11449134	Haertle	-0.0063	CpG island		0.0002	0.0004	0.7171	0.947794	+--++-	71.6	17.622	5	0.00346	chr19	51897791	+	Island
cg11703745	Haertle	0.0187	TMCC2		-0.0014	0.0018	0.4501	0.902238	-----+	10	5.556	5	0.3518	chr1	205199293	+	S_Shore	TMCC2	Body
cg12841566	Haertle	0.0094	MADD		0.001	0.0011	0.3605	0.860695	+-++++	0	1.062	5	0.9574	chr11	47296317	-	OpenSea	MADD;MADD;MADD;MADD;MADD;MADD;MADD;MADD;MADD;MADD	Body;Body;Body;Body;Body;Body;Body;Body;Body;Body
cg13153307	Haertle	0.0155	SEC16A		-0.0002	0.0015	0.9005	0.954101	++--++	0	4.278	5	0.5102	chr9	139368749	+	Island	SEC16A	Body
cg13706613	Haertle	0.011	INPP5E		-0.0011	0.0012	0.3652	0.860695	-+---+	31.7	7.325	5	0.1976	chr9	139324927	-	N_Shore	INPP5E	Body
cg14088574	Haertle	0.0134	VPS52		0.0002	0.0011	0.8356	0.947794	+-+-?+	0	1.296	4	0.862	chr6	33234976	-	OpenSea	VPS52	Body
cg14597908	Haertle	0.0135	GNAS		-0.0015	0.0023	0.511	0.909371	++--++	71.3	17.432	5	0.003749	chr20	57414960	+	N_Shore	GNASAS;GNAS;GNAS	Body;1stExon;5'UTR
cg15737302	Haertle	-0.0185	North shelf		-0.002	0.0018	0.2823	0.860695	-++---	48	9.608	5	0.08712	chr11	118302063	+	N_Shelf
cg16126178	Haertle	0.0135	AKT1		-0.0018	0.0015	0.2458	0.841392	-+---+	74.7	19.788	5	0.001369	chr14	105239857	-	N_Shore	AKT1;AKT1;AKT1	Body;Body;Body
cg17881203	Haertle	0.014	WDR18		-0.0002	0.001	0.8619	0.9523	-++---	0	4.191	5	0.5223	chr19	990398	+	Island	WDR18	Body
cg17921080	Haertle	-0.0236	Open sea		-0.001	0.0017	0.5681	0.933044	-++---	55.2	11.149	5	0.04851	chr14	86478932	-	OpenSea
cg18502630	Haertle	0.0135	PTGDS		-0.0011	0.0014	0.444	0.902238	-+--++	16.5	5.989	5	0.3072	chr9	139871955	-	N_Shore	PTGDS;PTGDS	5'UTR;1stExon
cg18906596	Haertle	-0.0229	ANKFY1		0.0033	0.0018	0.05976	0.59096	-++++-	74.2	19.377	5	0.001635	chr17	4151473	-	OpenSea	ANKFY1;ANKFY1	Body;Body
cg19143209	Haertle	-0.0274	CpG island		0.0043	0.0026	0.1043	0.66305	+--+++	48.8	9.769	5	0.08204	chr9	19789287	+	Island
cg19169154	Haertle	0.0321	MFAP4		-0.0036	0.002	0.07445	0.602368	++----	0	3.329	5	0.6495	chr17	19287978	+	OpenSea	MFAP4	Body
cg19830000	Haertle	-0.0048	NELL2		0.0005	0.0007	0.4524	0.902238	+---++	52.5	10.524	5	0.06168	chr12	45270312	+	Island	NELL2;NELL2;NELL2;NELL2;NELL2	Body;Body;TSS1500;TSS200;TSS200
cg20935025	Haertle	0.027	NFKBIA		0.0016	0.0012	0.1607	0.722923	+++-+-	0	2.657	5	0.7527	chr14	35874013	+	S_Shore	NFKBIA	TSS200
cg21143899	Haertle	0.0153	UCK2		-0.001	0.0014	0.483	0.902238	-+--+-	34.3	7.606	5	0.1793	chr1	165866296	+	OpenSea	UCK2	Body
cg22865713	Haertle	-0.0338	SLC17A4		-0.0019	0.0028	0.4986	0.90562	-+-+--	63.7	13.791	5	0.01699	chr6	25779897	+	OpenSea	SLC17A4	3'UTR
cg23376861	Haertle	-0.0432	ATP5A1		-0.0001	0.0031	0.9655	0.984563	--+--+	0	2.345	5	0.7996	chr18	43678713	+	S_Shore	ATP5A1;ATP5A1	5'UTR;TSS1500
cg25871543	Haertle	0.0141	XAB2		0.0003	0.0012	0.7803	0.947794	-+--++	0	3.279	5	0.657	chr19	7686181	+	Island	XAB2	Body
cg25927444	Haertle	-0.0191	TTC7A		-0.0009	0.0018	0.6229	0.947794	-++-+-	49.1	9.816	5	0.08061	chr2	47236103	-	OpenSea	TTC7A	Body
cg26001655	Haertle	0.0125	KIAA1530		0.0005	0.0007	0.5211	0.909371	-++--+	39.2	8.221	5	0.1445	chr4	1356770	-	OpenSea	KIAA1530	Body
cg26406256	Haertle	0.0183	HERC3; NAP1L5		0.0006	0.0016	0.7351	0.947794	-++-+-	11.9	5.677	5	0.339	chr4	89619393	-	OpenSea	HERC3;NAP1L5	Body;TSS1500
cg26828643	Haertle	0.0151	FAM38A		-0.0006	0.0016	0.6989	0.947794	-++-+-	0	3.836	5	0.5733	chr16	88802820	-	N_Shore	FAM38A	Body
cg27509867	Haertle	0.0142	Open sea		0.0013	0.0014	0.3287	0.860695	--+-++	0	2.35	5	0.7989	chr8	129165585	+	OpenSea
cg00510787	Quilter	-0.132435	C6orf96	Male Infants	-0.0008	0.0008	0.2973	0.860695	+--+-+	16.9	6.02	5	0.3043	chr6	151772946	-	N_Shore	C6orf211;RMND1	TSS1500;5'UTR
cg03169527	Quilter	-0.148314	C3orf31	Male Infants	0.0006	0.0005	0.2202	0.825475	++-+++	0	0.535	5	0.9908	chr3	11888582	+	S_Shore	C3orf31	TSS1500
cg03849074	Quilter	0.127964	ZNF306	Female Infants	-0.0019	0.0012	0.1043	0.66305	++++--	0	4.32	5	0.5044	chr6	28317796	-	OpenSea	ZKSCAN3;ZNF323;ZKSCAN3;ZNF323	1stExon;5'UTR;5'UTR;5'UTR
cg03923277	Quilter	0.144279	TDG	Female Infants	-0.0011	0.0038	0.764	0.947794	----++	33	7.463	5	0.1884	chr12	104359732	-	Island	TDG;TDG	1stExon;5'UTR
cg04721883	Quilter	-0.13622	ESX1	Female Infants	0.0006	0.0029	0.8398	0.947794	?++-??	15.3	2.362	2	0.307	chrX	103499577	-	Island	ESX1;ESX1	5'UTR;1stExon
cg07011110	Quilter	-0.116574	BTN1A1	Female Infants	0.0069	0.0039	0.0734	0.602368	--+-+-	60.3	12.587	5	0.02757	chr6	26500482	-	N_Shore	BTN1A1	TSS1500
cg07404485	Quilter	0.102043	PON1	Male Infants	-0.0053	0.0051	0.3011	0.860695	--+---	0	3.176	5	0.6729	chr7	94953653	-	N_Shore	PON1	Body
cg08471713	Quilter	-0.116177	MEOX1	Male Infants	-0.0087	0.0058	0.1306	0.722923	-++-+-	50.5	10.1	5	0.07245	chr17	41738893	+	OpenSea	MEOX1;MEOX1;MEOX1	1stExon;1stExon;5'UTR
cg09303642	Quilter	-0.11431	NFE2	Female Infants	-0.0075	0.0055	0.1728	0.722923	------	0	3.9	5	0.5639	chr12	54690818	-	OpenSea	NFE2;NFE2	TSS1500;5'UTR
cg09419670	Quilter	-0.12611	PSMD5	Female Infants	-0.0057	0.0081	0.4816	0.902238	++-+--	45.6	9.199	5	0.1014	chr9	123605666	+	S_Shore	PSMD5;LOC253039	TSS1500;Body
cg10591659*	Quilter	-0.285563	NYX	Male Infants	-0.0318	0.0132	0.0163	0.483567	?---??	0	1.889	2	0.3888	chrX	41306768	+	OpenSea	NYX;NYX	5'UTR;1stExon
cg12791554	Quilter	-0.113588	TAS2R49	Female Infants	-0.0021	0.0017	0.2226	0.825475	--+--+	27.7	6.912	5	0.2272	chr12	11151622	-	OpenSea	PRR4;TAS2R20;PRH1	Body;TSS1500;5'UTR
cg13334990	Quilter	-0.109802	ENO2	Male Infants	0.0061	0.004	0.1222	0.722923	++-+?-	80.9	20.895	4	0.0003323	chr12	7023763	+	Island	ENO2;ENO2	1stExon;5'UTR
cg14159672	Quilter	0.139026	FLJ32569	Male Infants	-0.0029	0.0147	0.8413	0.947794	-+-+-+	8.2	5.444	5	0.3641	chr1	205819179	+	Island	PM20D1	1stExon
cg14893161	Quilter	0.150496	FLJ32569	Male Infants	0.001	0.012	0.9341	0.978058	-+-+-+	0	4.824	5	0.4377	chr1	205819251	-	S_Shore	PM20D1;PM20D1	5'UTR;1stExon
cg16474696	Quilter	-0.151149	MGC3207	Female Infants	0.0184	0.0136	0.1771	0.722923	+-+++-	0.2	5.008	5	0.4149	chr19	13875014	-	N_Shore	MRI1;MRI1	TSS1500;TSS1500
cg16474696	Quilter	-0.149289	MGC3207	Male Infants	0.0184	0.0136	0.1771	0.722923	+-+++-	0.2	5.008	5	0.4149	chr19	13875014	-	N_Shore	MRI1;MRI1	TSS1500;TSS1500
cg17439694	Quilter	-0.129787	CP	Male Infants	-0.003	0.0031	0.343	0.860695	-+---+	39.3	8.243	5	0.1433	chr3	148939523	-	OpenSea	CP	1stExon
cg18885346	Quilter	-0.112028	PKHD1	Female Infants	-0.004	0.0024	0.09446	0.66305	+--+--	21	6.329	5	0.2755	chr6	51953114	-	OpenSea	PKHD1;PKHD1	TSS1500;TSS1500
cg19857457	Quilter	-0.124253	RPL17	Male Infants	-0.0005	0.0007	0.4866	0.902238	+--+--	0	1.969	5	0.8534	chr18	47018947	+	Island	RPL17;SNORD58A;SNORD58B;RPL17	TSS200;TSS1500;TSS1500;TSS200
cg20507276*	Quilter	-0.29406	OR2L13	Male Infants	-0.0298	0.0091	0.001028	0.045746	-+----	33.9	7.563	5	0.182	chr1	248100600	+	Island	OR2L13;OR2L13	1stExon;5'UTR
cg20507276*	Quilter	-0.113065	OR2L13	Female Infants	-0.0298	0.0091	0.001028	0.045746	-+----	33.9	7.563	5	0.182	chr1	248100600	+	Island	OR2L13;OR2L13	1stExon;5'UTR
cg21649520	Quilter	-0.131094	PMP2	Male Infants	0.0014	0.0019	0.4653	0.902238	-++--+	41.3	8.517	5	0.1299	chr8	82359799	-	OpenSea	PMP2	TSS200
cg21717724	Quilter	-0.158095	PSMD5	Female Infants	-0.0027	0.0077	0.7287	0.947794	++-+--	58.2	11.973	5	0.03517	chr9	123604514	+	N_Shore	PSMD5;LOC253039	Body;TSS1500
cg24468890	Quilter	0.13142	HDAC1	Female Infants	0.0021	0.0025	0.386	0.860695	+++-+-	64	13.898	5	0.01627	chr1	32757294	-	N_Shore	HDAC1	TSS1500
cg26130726	Quilter	-0.123727	CYB5R4	Male Infants	0.0002	0.0009	0.8204	0.947794	+++++-	64.2	13.981	5	0.01573	chr6	84569839	+	S_Shore	CYB5R4	Body
cg27105123	Quilter	-0.129444	EPS8L1	Female Infants	0.0017	0.0045	0.7085	0.947794	-+-++-	0	2.48	5	0.7795	chr19	55582635	-	OpenSea
Bolding indicates that effect estimates were in the same direction for the study indicated in Column B and the meta-analysis
*Indicates that effect estimates were in the same direction for the study indicated in Column B and the meta-analysis and that the raw p-value from the meta-analysis was < 0.05

## Sheet: Table S7
Table S7. Look-Up Results for Meta-Analysis Adjusted for Cell Heterogeneity
MarkerName	Study	Effect.Estimate	Gene	Notes	Meta.Analysis.Effect.Estimate	StdErr	P_value	P_FDR	Direction	HetISq	HetChiSq	HetDf	HetPVal	chr	pos	strand	Relation_to_Island	UCSC_RefGene_Name	UCSC_RefGene_Group
cg01784351	El Hajj	-	MEST		-0.0027	0.0023	0.2469	0.800783	-+-+---	0	1.607	6	0.952	chr7	130132265	-	Island	MEST;MEST;MESTIT1;MEST	5'UTR;5'UTR;TSS1500;Body
cg04111177	El Hajj	-	NR3C1		0.0001	0.0005	0.8381	0.962683	--+--++	29.4	8.502	6	0.2036	chr5	142783607	-	Island	NR3C1;NR3C1;NR3C1;NR3C1;NR3C1;NR3C1;NR3C1	5'UTR;TSS1500;5'UTR;5'UTR;5'UTR;TSS1500;TSS1500
cg05556276	El Hajj	-	MEST		-0.0002	0.0013	0.8774	0.968723	+-++--+	0	1.999	6	0.9198	chr7	130132161	-	Island	MEST;MEST;MEST;MESTIT1	5'UTR;1stExon;5'UTR;TSS1500
cg05862114	El Hajj	-	MEST		-0.0004	0.0019	0.8314	0.962683	+--++++	0	3.174	6	0.7867	chr7	130132259	-	Island	MEST;MEST;MESTIT1;MEST	5'UTR;5'UTR;TSS1500;Body
cg15910486	El Hajj	-	NR3C1		0.0002	0.0005	0.6426	0.853603	+--++-+	39.8	9.97	6	0.1259	chr5	142783621	+	Island	NR3C1;NR3C1;NR3C1;NR3C1;NR3C1;NR3C1;NR3C1	5'UTR;TSS1500;5'UTR;5'UTR;5'UTR;TSS1500;TSS1500
cg17580798	El Hajj	-	MEST		0.0004	0.0019	0.8329	0.962683	++-++++	0	1.983	6	0.9213	chr7	130132199	-	Island	MEST;MEST;MESTIT1;MEST	5'UTR;5'UTR;TSS1500;Body
cg17860381	El Hajj	-	NR3C1		0.0003	0.0001	0.02754	0.353775	+-+++++	0	3.707	6	0.7163	chr5	142783569	-	Island	NR3C1;NR3C1;NR3C1;NR3C1;NR3C1;NR3C1;NR3C1	5'UTR;TSS1500;5'UTR;5'UTR;5'UTR;TSS1500;TSS1500
cg18068240	El Hajj	-	NR3C1		-0.0001	0.0001	0.6187	0.847143	--+--++	0	4.776	6	0.5729	chr5	142783843	-	Island	NR3C1;NR3C1;NR3C1;NR3C1;NR3C1;NR3C1;NR3C1	5'UTR;TSS1500;5'UTR;5'UTR;5'UTR;TSS1500;TSS1500
cg00063535	Haertle	0.0175	TPCN1		-0.0002	0.0016	0.9032	0.968723	----+++	5.7	6.365	6	0.3836	chr12	113729491	-	OpenSea	TPCN1;TPCN1	Body;Body
cg00273340	Haertle	0.0145	CCDC88B		0	0.0009	0.9704	0.992047	-+++-+-	31.4	8.75	6	0.1881	chr11	64112444	-	Island	CCDC88B	Body
cg00730857	Haertle	0.009	WHSC2		-0.0007	0.0011	0.5351	0.818649	---+++-	0.7	6.042	6	0.4185	chr4	1994281	-	N_Shore	WHSC2	Body
cg01203331*	Haertle	0.0149	NOP56; SNORD56, 57, 86		0.0026	0.0012	0.02982	0.353775	++++++-	0	5.869	6	0.438	chr20	2636597	-	S_Shelf	SNORD57;NOP56;NOP56;SNORD56;SNORD86	TSS1500;Body;Body;TSS1500;TSS200
cg01205011	Haertle	-0.0244	ZNF76		0.0021	0.0023	0.3587	0.800783	++++-++	9.1	6.602	6	0.3592	chr6	35262113	-	OpenSea	ZNF76	Body
cg01955962	Haertle	-0.0064	CpG island		0.0001	0.0005	0.8437	0.962683	----+++	51.8	12.445	6	0.05274	chr15	73089536	+	Island
cg01968402	Haertle	0.0058	North shore		0.0004	0.0003	0.1827	0.739105	+--++-+	0	4.576	6	0.5993	chr6	137817775	+	N_Shore
cg01993865	Haertle	-0.0078	DSTN		-0.0001	0.0002	0.4933	0.816734	+-++--+	37.7	9.623	6	0.1414	chr20	17550690	-	Island	DSTN;DSTN;DSTN;DSTN	5'UTR;5'UTR;1stExon;1stExon
cg02683621	Haertle	0.0159	North shore		-0.0009	0.0013	0.4707	0.816734	++----+	0	3.542	6	0.7384	chr7	150100820	+	N_Shore
cg02943336	Haertle	0.0133	CARD11		-0.0014	0.001	0.1492	0.698884	-+-+---	0	2.555	6	0.8622	chr7	2959067	+	OpenSea	CARD11	Body
cg03246914	Haertle	-0.0305	TUBB1		-0.0027	0.0024	0.2601	0.800783	+++--+-	49.5	11.877	6	0.06476	chr20	57596113	+	N_Shelf	TUBB1	Body
cg03345925*	Haertle	0.0383	ZC3H3		0.0053	0.0027	0.04797	0.377953	+++++--	15.4	7.094	6	0.3122	chr8	144599347	+	N_Shelf	ZC3H3	Body
cg04078644	Haertle	-0.0169	North shelf		-0.0003	0.0009	0.7017	0.875086	-++-+--	0	5.491	6	0.4826	chr3	155458975	+	N_Shelf
cg04514868	Haertle	0.0108	MTA1		0.0004	0.0011	0.7156	0.875086	+++++--	0	2.065	6	0.9137	chr14	105931040	+	Island	MTA1	Body
cg05536286	Haertle	-0.0122	ST8SIA2		0.0008	0.001	0.4079	0.806681	+--+++-	0	4.948	6	0.5505	chr15	92972514	-	OpenSea	ST8SIA2	Body
cg05697697	Haertle	0.0062	XPNPEP1		0.0001	0.0002	0.53	0.818649	-+--+--	25.2	8.025	6	0.2363	chr10	111683345	+	Island	XPNPEP1;XPNPEP1;XPNPEP1	TSS200;TSS200;TSS200
cg07018980	Haertle	0.0167	GAK		-0.0012	0.0011	0.2515	0.800783	+---+--	1.5	6.088	6	0.4134	chr4	895604	+	S_Shore	GAK	Body
cg07431064	Haertle	0.0112	CBX7		-0.0001	0.0014	0.9143	0.968723	+--++--	0	4.798	6	0.5699	chr22	39529217	+	OpenSea	CBX7	3'UTR
cg07689396	Haertle	0.0142	PRKAR1B		-0.0026	0.0013	0.03697	0.353775	+-----+	18.1	7.328	6	0.2915	chr7	633050	+	S_Shore	PRKAR1B;PRKAR1B;PRKAR1B;PRKAR1B;PRKAR1B;PRKAR1B	Body;Body;Body;Body;Body;Body
cg08077807	Haertle	-0.0253	PRKCH		0.0004	0.0013	0.7276	0.875086	++-+-++	0	2.192	6	0.9012	chr14	62001072	+	OpenSea	PRKCH	Body
cg08144943	Haertle	0.0191	PPM1M		-0.0009	0.0017	0.5959	0.847143	+-+-+--	50.9	12.215	6	0.05735	chr3	52280702	+	S_Shore	PPM1M;PPM1M	5'UTR;5'UTR
cg08440349	Haertle	0.0133	ATP2C2		-0.0012	0.0014	0.4003	0.806681	+-+----	0	5.093	6	0.5319	chr16	84486704	+	OpenSea	ATP2C2	Body
cg08542429	Haertle	0.0142	AGPAT1		-0.0012	0.0013	0.3577	0.800783	-+-+?--	13.7	5.794	5	0.3268	chr6	32139120	+	S_Shelf	AGPAT1;AGPAT1	Body;Body
cg08732684	Haertle	0.022	ATF6B		-0.0006	0.0016	0.7246	0.875086	++++?--	58.3	11.983	5	0.03502	chr6	32095128	+	N_Shelf	ATF6B;ATF6B	Body;Body
cg09244071	Haertle	0.0138	CUX1		-0.0005	0.0011	0.6569	0.859766	-+-+---	0	4.137	6	0.6581	chr7	101768746	-	OpenSea	CUX1;CUX1;CUX1	Body;Body;Body
cg10288510	Haertle	-0.0089	CpG island		-0.001	0.001	0.3177	0.800783	-+-+--+	12.8	6.879	6	0.3322	chr1	214158727	-	Island
cg10778517	Haertle	0.0118	MAD1L1		0.0008	0.0008	0.3272	0.800783	-+++--+	5.3	6.338	6	0.3864	chr7	2252773	+	S_Shelf	MAD1L1;MAD1L1;MAD1L1	Body;Body;Body
cg11010397	Haertle	-0.0181	AMPH		0.0008	0.0008	0.3453	0.800783	------+	28.7	8.42	6	0.2089	chr7	38671977	+	S_Shore	AMPH;AMPH	TSS1500;TSS1500
cg11449134	Haertle	-0.0063	CpG island		0.0002	0.0004	0.6762	0.8722	+--++--	32.5	8.891	6	0.1798	chr19	51897791	+	Island
cg11703745	Haertle	0.0187	TMCC2		-0.0013	0.0016	0.4236	0.806681	+-----+	24	7.894	6	0.246	chr1	205199293	+	S_Shore	TMCC2	Body
cg12841566	Haertle	0.0094	MADD		0.0009	0.001	0.3689	0.800783	+-+++-+	0	1.864	6	0.9318	chr11	47296317	-	OpenSea	MADD;MADD;MADD;MADD;MADD;MADD;MADD;MADD;MADD;MADD	Body;Body;Body;Body;Body;Body;Body;Body;Body;Body
cg13153307	Haertle	0.0155	SEC16A		-0.0009	0.0013	0.5139	0.816734	++--+--	38.6	9.777	6	0.1343	chr9	139368749	+	Island	SEC16A	Body
cg13706613	Haertle	0.011	INPP5E		-0.0009	0.0011	0.3849	0.805553	++---++	20.5	7.551	6	0.2728	chr9	139324927	-	N_Shore	INPP5E	Body
cg14088574	Haertle	0.0134	VPS52		0	0.0011	0.9809	0.992047	+--+?-+	0	0.819	5	0.9758	chr6	33234976	-	OpenSea	VPS52	Body
cg14597908	Haertle	0.0135	GNAS		-0.0039	0.0019	0.03779	0.353775	++--+-+	57.4	14.091	6	0.02864	chr20	57414960	+	N_Shore	GNASAS;GNAS;GNAS	Body;1stExon;5'UTR
cg15737302	Haertle	-0.0185	North shelf		-0.0017	0.0016	0.288	0.800783	-++----	0.1	6.006	6	0.4225	chr11	118302063	+	N_Shelf
cg16126178	Haertle	0.0135	AKT1		-0.0011	0.0015	0.4627	0.816734	++---++	63.4	16.371	6	0.01189	chr14	105239857	-	N_Shore	AKT1;AKT1;AKT1	Body;Body;Body
cg17881203	Haertle	0.014	WDR18		0	0.001	0.9794	0.992047	-+++---	0	1.844	6	0.9335	chr19	990398	+	Island	WDR18	Body
cg17921080	Haertle	-0.0236	Open sea		0.0007	0.0015	0.6115	0.847143	++++-+-	0	4.518	6	0.607	chr14	86478932	-	OpenSea
cg18502630	Haertle	0.0135	PTGDS		-0.0013	0.0014	0.3427	0.800783	++--+--	0	4.284	6	0.6383	chr9	139871955	-	N_Shore	PTGDS;PTGDS	5'UTR;1stExon
cg18906596	Haertle	-0.0229	ANKFY1		0.0035	0.0017	0.03795	0.353775	-+++++-	66.4	17.855	6	0.006606	chr17	4151473	-	OpenSea	ANKFY1;ANKFY1	Body;Body
cg19143209	Haertle	-0.0274	CpG island		0.0042	0.0025	0.09593	0.502222	+--++-+	52.6	12.66	6	0.04876	chr9	19789287	+	Island
cg19169154	Haertle	0.0321	MFAP4		-0.0046	0.0018	0.008458	0.250921	++-----	0	3.997	6	0.677	chr17	19287978	+	OpenSea	MFAP4	Body
cg19830000	Haertle	-0.0048	NELL2		-0.0001	0.0006	0.9134	0.968723	----+-+	58.9	14.607	6	0.02354	chr12	45270312	+	Island	NELL2;NELL2;NELL2;NELL2;NELL2	Body;Body;TSS1500;TSS200;TSS200
cg20935025	Haertle	0.027	NFKBIA		0.0008	0.0012	0.5113	0.816734	-++-++-	40	9.997	6	0.1248	chr14	35874013	+	S_Shore	NFKBIA	TSS200
cg21143899	Haertle	0.0153	UCK2		-0.0007	0.0013	0.5761	0.847143	++--+--	26.7	8.189	6	0.2246	chr1	165866296	+	OpenSea	UCK2	Body
cg22865713	Haertle	-0.0338	SLC17A4		0.0017	0.0025	0.4954	0.816734	-+-+-+-	60.6	15.237	6	0.01849	chr6	25779897	+	OpenSea	SLC17A4	3'UTR
cg23376861	Haertle	-0.0432	ATP5A1		-0.0019	0.0025	0.4483	0.816734	+-----+	0	2.447	6	0.8744	chr18	43678713	+	S_Shore	ATP5A1;ATP5A1	5'UTR;TSS1500
cg25871543	Haertle	0.0141	XAB2		0.0004	0.0011	0.7165	0.875086	++--+++	0	3.754	6	0.7099	chr19	7686181	+	Island	XAB2	Body
cg25927444	Haertle	-0.0191	TTC7A		0.0011	0.0016	0.5043	0.816734	-++-+--	0	5.575	6	0.4724	chr2	47236103	-	OpenSea	TTC7A	Body
cg26001655	Haertle	0.0125	KIAA1530		0.0006	0.0007	0.3892	0.805553	-++-+++	0	5.885	6	0.4363	chr4	1356770	-	OpenSea	KIAA1530	Body
cg26406256	Haertle	0.0183	HERC3; NAP1L5		0.0001	0.0013	0.9309	0.974707	++--+--	0	5.131	6	0.5272	chr4	89619393	-	OpenSea	HERC3;NAP1L5	Body;TSS1500
cg26828643	Haertle	0.0151	FAM38A		-0.0002	0.0015	0.8875	0.968723	+++-+--	0	4.029	6	0.6728	chr16	88802820	-	N_Shore	FAM38A	Body
cg27509867	Haertle	0.0142	Open sea		0.0024	0.0014	0.07234	0.429217	+-+-+++	29.2	8.472	6	0.2055	chr8	129165585	+	OpenSea
cg00510787	Quilter	-0.132435	C6orf96	Male Infants	-0.0015	0.0008	0.05096	0.377953	--++-++	32.8	8.927	6	0.1777	chr6	151772946	-	N_Shore	C6orf211;RMND1	TSS1500;5'UTR
cg03169527	Quilter	-0.148314	C3orf31	Male Infants	0.0002	0.0005	0.6025	0.847143	-++++++	0	3.695	6	0.7178	chr3	11888582	+	S_Shore	C3orf31	TSS1500
cg03849074	Quilter	0.127964	ZNF306	Female Infants	-0.0018	0.0011	0.09285	0.502222	-+++---	0	4.938	6	0.5518	chr6	28317796	-	OpenSea	ZKSCAN3;ZNF323;ZKSCAN3;ZNF323	1stExon;5'UTR;5'UTR;5'UTR
cg03923277	Quilter	0.144279	TDG	Female Infants	-0.0022	0.0036	0.5427	0.818649	---++-+	25.1	8.012	6	0.2373	chr12	104359732	-	Island	TDG;TDG	1stExon;5'UTR
cg04721883	Quilter	-0.13622	ESX1	Female Infants	0.0031	0.003	0.3043	0.800783	?++-?+?	6.9	3.223	3	0.3584	chrX	103499577	-	Island	ESX1;ESX1	5'UTR;1stExon
cg07011110	Quilter	-0.116574	BTN1A1	Female Infants	0.008	0.0036	0.02618	0.353775	--+-++-	46.9	11.304	6	0.07942	chr6	26500482	-	N_Shore	BTN1A1	TSS1500
cg07404485	Quilter	0.102043	PON1	Male Infants	-0.0047	0.0051	0.3621	0.800783	--+--++	0	4.238	6	0.6445	chr7	94953653	-	N_Shore	PON1	Body
cg08471713*	Quilter	-0.116177	MEOX1	Male Infants	-0.0113	0.0055	0.03975	0.353775	-++-+--	42.6	10.461	6	0.1065	chr17	41738893	+	OpenSea	MEOX1;MEOX1;MEOX1	1stExon;1stExon;5'UTR
cg09303642	Quilter	-0.11431	NFE2	Female Infants	-0.0043	0.0023	0.06541	0.415821	----+--	0	2.506	6	0.8678	chr12	54690818	-	OpenSea	NFE2;NFE2	TSS1500;5'UTR
cg09419670	Quilter	-0.12611	PSMD5	Female Infants	-0.0101	0.008	0.206	0.781717	++-+---	40.5	10.076	6	0.1215	chr9	123605666	+	S_Shore	PSMD5;LOC253039	TSS1500;Body
cg10591659	Quilter	-0.285563	NYX	Male Infants	-0.0214	0.0113	0.05828	0.398994	?---?-?	11.3	3.381	3	0.3365	chrX	41306768	+	OpenSea	NYX;NYX	5'UTR;1stExon
cg12791554	Quilter	-0.113588	TAS2R49	Female Infants	-0.0014	0.0017	0.426	0.806681	+-+---+	35.4	9.283	6	0.1583	chr12	11151622	-	OpenSea	PRR4;TAS2R20;PRH1	Body;TSS1500;5'UTR
cg13334990	Quilter	-0.109802	ENO2	Male Infants	0.0055	0.0038	0.1423	0.698884	++-+?+-	52.7	10.565	5	0.06071	chr12	7023763	+	Island	ENO2;ENO2	1stExon;5'UTR
cg14159672	Quilter	0.139026	FLJ32569	Male Infants	-0.0149	0.0143	0.2984	0.800783	---+--+	47.9	11.519	6	0.07361	chr1	205819179	+	Island	PM20D1	1stExon
cg14893161	Quilter	0.150496	FLJ32569	Male Infants	-0.0077	0.0117	0.5093	0.816734	---+--+	35	9.233	6	0.1609	chr1	205819251	-	S_Shore	PM20D1;PM20D1	5'UTR;1stExon
cg16474696	Quilter	-0.151149	MGC3207	Female Infants	0.0183	0.0133	0.1702	0.721324	+-+++--	0	5.024	6	0.5408	chr19	13875014	-	N_Shore	MRI1;MRI1	TSS1500;TSS1500
cg16474696	Quilter	-0.149289	MGC3207	Male Infants	0.0183	0.0133	0.1702	0.721324	+-+++--	0	5.024	6	0.5408	chr19	13875014	-	N_Shore	MRI1;MRI1	TSS1500;TSS1500
cg17439694	Quilter	-0.129787	CP	Male Infants	0	0.0027	0.9964	0.9964	++--+-+	74.2	23.259	6	0.0007142	chr3	148939523	-	OpenSea	CP	1stExon
cg18885346	Quilter	-0.112028	PKHD1	Female Infants	-0.0025	0.002	0.2108	0.781717	+--+-++	42.5	10.44	6	0.1073	chr6	51953114	-	OpenSea	PKHD1;PKHD1	TSS1500;TSS1500
cg19857457	Quilter	-0.124253	RPL17	Male Infants	-0.0006	0.0006	0.3633	0.800783	--++---	0	3.162	6	0.7883	chr18	47018947	+	Island	RPL17;SNORD58A;SNORD58B;RPL17	TSS200;TSS1500;TSS1500;TSS200
cg20507276*	Quilter	-0.29406	OR2L13	Male Infants	-0.0289	0.0092	0.001633	0.0726685	-+---+-	50.4	12.087	6	0.06005	chr1	248100600	+	Island	OR2L13;OR2L13	1stExon;5'UTR
cg20507276*	Quilter	-0.113065	OR2L13	Female Infants	-0.0289	0.0092	0.001633	0.0726685	-+---+-	50.4	12.087	6	0.06005	chr1	248100600	+	Island	OR2L13;OR2L13	1stExon;5'UTR
cg21649520	Quilter	-0.131094	PMP2	Male Infants	0.0002	0.0017	0.8984	0.968723	+++---+	14.6	7.022	6	0.3188	chr8	82359799	-	OpenSea	PMP2	TSS200
cg21717724	Quilter	-0.158095	PSMD5	Female Infants	-0.004	0.0074	0.5871	0.847143	++-+---	55.7	13.542	6	0.03519	chr9	123604514	+	N_Shore	PSMD5;LOC253039	Body;TSS1500
cg24468890	Quilter	0.13142	HDAC1	Female Infants	0.0023	0.0025	0.3665	0.800783	-+++++-	34.8	9.205	6	0.1624	chr1	32757294	-	N_Shore	HDAC1	TSS1500
cg26130726	Quilter	-0.123727	CYB5R4	Male Infants	-0.0009	0.0008	0.2431	0.800783	--+++--	17.1	7.234	6	0.2997	chr6	84569839	+	S_Shore	CYB5R4	Body
cg27105123	Quilter	-0.129444	EPS8L1	Female Infants	0.0019	0.004	0.6324	0.852782	-+-++--	0	3.195	6	0.784	chr19	55582635	-	OpenSea
Bolding indicates that effect estimates were in the same direction for the study indicated in Column B and the meta-analysis
*Indicates that effect estimates were in the same direction for the study indicated in Column B and the meta-analysis and that the raw p-value from the meta-analysis was < 0.05
